# Supplementary material for: Simultaneous Determination of Seven Antibiotics and Five of Their Metabolites in Municipal Wastewater and Evaluation of Their Stability under Laboratory Conditions
Source: MDPI journal article supplement (doi:10.3390/ijerph182010640), 2021-10-11
Supplement: s1 [file s1]

Supplementary Information

Simultaneous Determination of Seven Antibiotics and Five of Their Metabolites in Municipal Wastewater and Evaluation of Their Stability under Laboratory Conditions

Sheng Han <sup>1</sup>, Xinyue Li <sup>2</sup>, Hongmei Huang <sup>1</sup>, Ting Wang <sup>1</sup>, Zhenglu Wang <sup>3</sup>, Xiaofang Fu <sup>1</sup>, Zilei Zhou <sup>4</sup>, Peng Du <sup>5</sup> and Xiqing Li <sup>1,\*</sup>

<sup>1</sup> Laboratory of Earth Surface Processes, College of Urban and Environmental Sciences, Peking University, Beijing 100871, China; hans@pku.edu.cn (S.H.); 1701214469@pku.edu.cn (H.H.); wangting7@pku.edu.cn (T.W.); fxiaof@pku.edu.cn (X.F.)  
<sup>2</sup> Development Research Center of the Ministry of Water Resources of P. R. China, Beijing 100036, China; lixinyue@waterinfo.com.cn  
<sup>3</sup> College of Oceanography, Hohai University, Nanjing 210098, China; 20190039@hhu.edu.cn  
<sup>4</sup> Hubei Provincial Academy of Eco-environmental Sciences, Wuhan 430070, China; 1601214925@pku.edu.cn  
<sup>5</sup> Beijing Key Laboratory of Urban Hydrological Cycle and Sponge City Technology, College of Water Sciences, Beijing Normal University, Beijing 100875, China; dup@bnu.edu.cn  
\* Correspondence: xli@urban.pku.edu.cn

**Table S1.** The selected analytes in this study.

| Groups       | Parent Antibiotics | Deuterated analogs              | Main Human Metabolite                   | Deuterated analogs                                     | Reference |
|--------------|--------------------|---------------------------------|-----------------------------------------|--------------------------------------------------------|-----------|
| Sulfonamides | Sulfapyridine      | Sulfapyridine-d <sub>4</sub>    | N <sup>4</sup> -Acetyl Sulfapyridine    | N <sup>4</sup> -Acetyl Sulfapyridine-d <sub>4</sub>    | [1]       |
|              | Sulfamethoxazole   | Sulfamethoxazole-d <sub>4</sub> | N <sup>4</sup> -Acetyl Sulfamethoxazole | N <sup>4</sup> -Acetyl Sulfamethoxazole-d <sub>4</sub> | [1]       |
| Macrolides   | Roxithromycin      | Roxithromycin-d <sub>7</sub>    | N-Demethyl Roxithromycin                | Roxithromycin-d <sub>7</sub>                           | [2]       |
|              | Azithromycin       | Azithromycin-d <sub>3</sub>     | Descladinose Azithromycin               | Azithromycin-d <sub>3</sub>                            | [3]       |
|              | Clarithromycin     | Clarithromycin-N-d <sub>3</sub> | —                                       | —                                                      | —         |
| Others       | Trimethoprim       | Trimethoprim-d <sub>3</sub>     | 4-Hydroxy Trimethoprim                  | 4-Hydroxy Trimethoprim-d <sub>9</sub>                  | [1]       |
|              | Lincomycin         | Roxithromycin-d <sub>7</sub>    | —                                       | —                                                      | —         |

[1] Petrie, B., Barden, R., Kasprzyk-Hordern, B., A review on emerging contaminants in wastewaters and the environment: current knowledge, understudied areas and recommendations for future monitoring. *Water Res.* 2015, 72, 3-27.

[2] Li, X. Q., Zhong, D. F., Huang, H. H., Wu, S. D., Demethylation metabolism of roxithromycin in humans and rats. *Acta Pharmacologica Sinica.* 2001, 22, 469-474.

[3] Luke, D. R., Foulds, G., Disposition of oral azithromycin in humans. *Clinical Pharmacology & Therapeutics.* 1997, 61, 641.

**Table S2.** The chemical characteristics of SPE cartridges used in this study.

| SPE cartridge                   | Abbreviation | Sorbent material                                                   | Surface area<br>(m <sup>2</sup> /g) | Pore size<br>(Å) | Particle size<br>(µm) |
|---------------------------------|--------------|--------------------------------------------------------------------|-------------------------------------|------------------|-----------------------|
| Cleanert ® PEP<br>(3 mL, 60 mg) | PEP          | Polystyrene and divinylbenzene                                     | 700                                 | 80               | 30                    |
| Oasis® MCX<br>(3 mL, 60 mg)     | MCX          | N-vinylpyrrolidone and divinylbenzene bonding with sulfonate group | 786                                 | 84               | 31.9                  |
| Oasis® HLB<br>(3 mL, 60 mg)     | HLB          | Hydrophilic N-vinylpyrrolidone and lipophilic divinylbenzene       | 810                                 | 83               | 29.8                  |

**Table S3.** Optimized instrument and MRM conditions of target analytes.

| Antibiotics            | Dwell<br>time<br>(s) | Parent<br>ion<br>(m/z) | Cone<br>voltage<br>(V) | Product<br>ion<br>(m/z) | Collision<br>energy<br>(eV) | Retention<br>time<br>(min) | Internal<br>standard   | IDL<br>(ng/mL) | IQL<br>(ng/mL) |
|------------------------|----------------------|------------------------|------------------------|-------------------------|-----------------------------|----------------------------|------------------------|----------------|----------------|
| SPY                    | 0.004                | 250.1                  | 35                     | 92.0*<br>156.0          | 25<br>15                    | 1.58                       | SPY-d <sub>4</sub>     | 0.004          | 0.01           |
| N-SPY                  | 0.004                | 292.0                  | 16                     | 133.5<br>197.7*         | 22<br>14                    | 1.79                       | N-SPY-d <sub>4</sub>   | 0.02           | 0.06           |
| SMX                    | 0.004                | 254.1                  | 30                     | 92.0*<br>156.0          | 25<br>15                    | 2.03                       | SMX-d <sub>4</sub>     | 0.007          | 0.02           |
| N-SMX                  | 0.003                | 296.0                  | 25                     | 133.6*<br>198.0         | 20<br>20                    | 2.33                       | N-SMX-d <sub>4</sub>   | 0.02           | 0.06           |
| CTM                    | 0.016                | 748.5                  | 30                     | 158.0*<br>590.2         | 30<br>20                    | 3.43                       | CTM-N-d <sub>3</sub>   | 0.002          | 0.008          |
| RTM                    | 0.016                | 837.6                  | 40                     | 158.1*<br>679.5         | 35<br>20                    | 3.47                       | RTM-d <sub>7</sub>     | 0.004          | 0.01           |
| N-RTM                  | 0.016                | 823.5                  | 14                     | 143.7*<br>665.5         | 38<br>22                    | 3.46                       | RTM-d <sub>7</sub>     | 0.003          | 0.009          |
| ATM                    | 0.003                | 749.5                  | 30                     | 158.2<br>591.5*         | 40<br>30                    | 2.61                       | ATM-d <sub>3</sub>     | 0.01           | 0.03           |
| Des-ATM                | 0.004                | 591.5                  | 62                     | 115.5<br>157.7*         | 34<br>30                    | 1.77                       | ATM-d <sub>3</sub>     | 0.07           | 0.2            |
| LIN                    | 0.005                | 407.2                  | 40                     | 126.1*<br>359.3         | 25<br>20                    | 1.83                       | RTM-d <sub>7</sub>     | 0.02           | 0.06           |
| TMP                    | 0.004                | 291.3                  | 30                     | 123.0*<br>230.0         | 30<br>30                    | 1.78                       | TMP-d <sub>3</sub>     | 0.009          | 0.03           |
| 4-H-TMP                | 0.004                | 307.0                  | 26                     | 138.6*<br>180.7         | 16<br>18                    | 1.89                       | 4-H-TMP-d <sub>9</sub> | 0.003          | 0.01           |
| SPY-d <sub>4</sub>     | 0.004                | 253.9                  | 30                     | 112.0                   | 22                          | 1.58                       | -                      | -              | -              |
| SMX-d <sub>4</sub>     | 0.004                | 257.9                  | 36                     | 159.7                   | 14                          | 2.03                       | -                      | -              | -              |
| N-SPY-d <sub>4</sub>   | 0.004                | 296.0                  | 8                      | 137.6                   | 22                          | 1.79                       | -                      | -              | -              |
| N-SMX-d <sub>4</sub>   | 0.003                | 300.2                  | 45                     | 137.0                   | 25                          | 2.33                       | -                      | -              | -              |
| CTM-N-d <sub>3</sub>   | 0.005                | 751.6                  | 6                      | 160.7                   | 30                          | 3.43                       | -                      | -              | -              |
| RTM-d <sub>7</sub>     | 0.016                | 844.7                  | 52                     | 157.7                   | 34                          | 3.47                       | -                      | -              | -              |
| ATM-d <sub>3</sub>     | 0.003                | 752.7                  | 46                     | 594.6                   | 28                          | 2.61                       | -                      | -              | -              |
| TMP-d <sub>3</sub>     | 0.004                | 294.1                  | 4                      | 229.9                   | 24                          | 1.78                       | -                      | -              | -              |
| 4-H-TMP-d <sub>9</sub> | 0.004                | 316.1                  | 2                      | 138.6                   | 20                          | 1.89                       | -                      | -              | -              |

\* Product ion was used for quantification

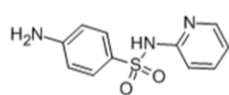

Sulfapyridine

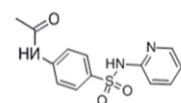

N-Acetyl Sulfapyridine

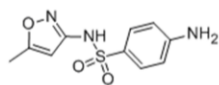

Sulfamethoxazole

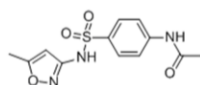

N-Acetyl Sulfamethoxazole

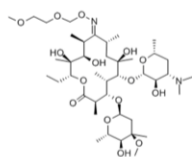

Roxithromycin

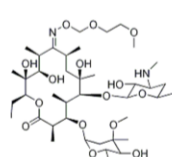

N-Demethyl Roxithromycin

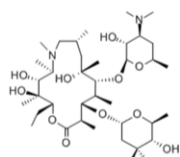

Azithromycin

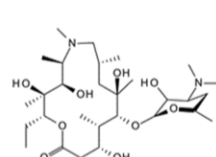

Descladinose Azithromycin

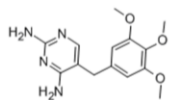

Trimethoprim

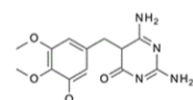

4-Hydroxy Trimethoprim

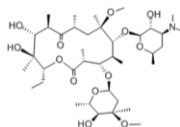

Clarithromycin

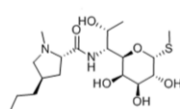

Lincomycin

**Figure S1.** The structures of the selected analytes in this study.

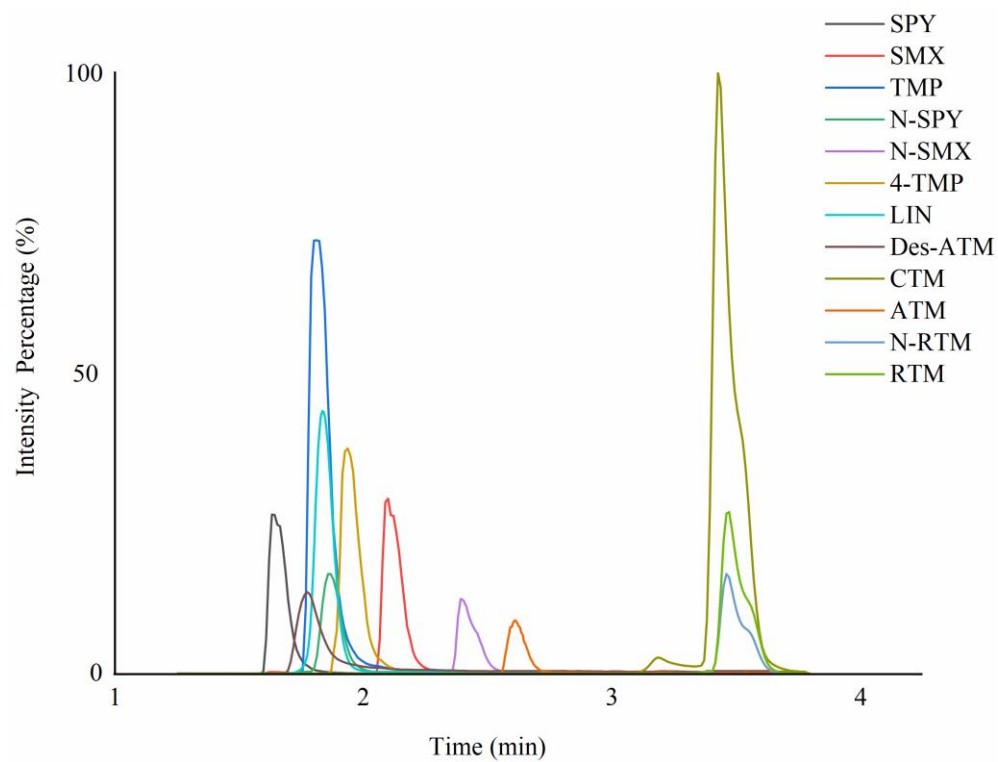

**Figure S2.** Total-ion chromatogram of the selected analytes prepared in methanol/ultrapure water (1:1) under mobile phase: 0.2% formic acid with 2 mM ammonium acetate in ultrapure water and acetonitrile (Combination 1). The concentration of the analytes was 50 µg/L.

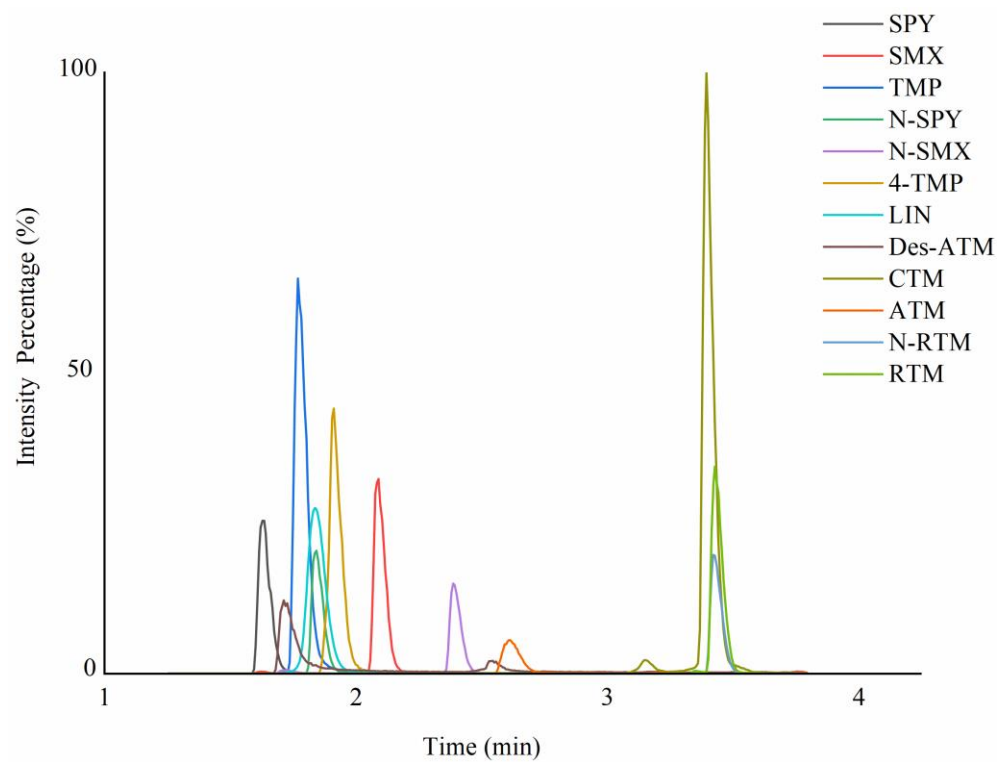

**Figure S3.** Total-ion chromatogram of the selected analytes prepared in methanol/ultrapure water (1:1) under mobile phase: ultrapure water containing 0.1% formic acid and 0.1% formic acid in methanol and acetonitrile (1:1,v/v) (Combination 2). The concentration of the analytes was 50 µg/L.

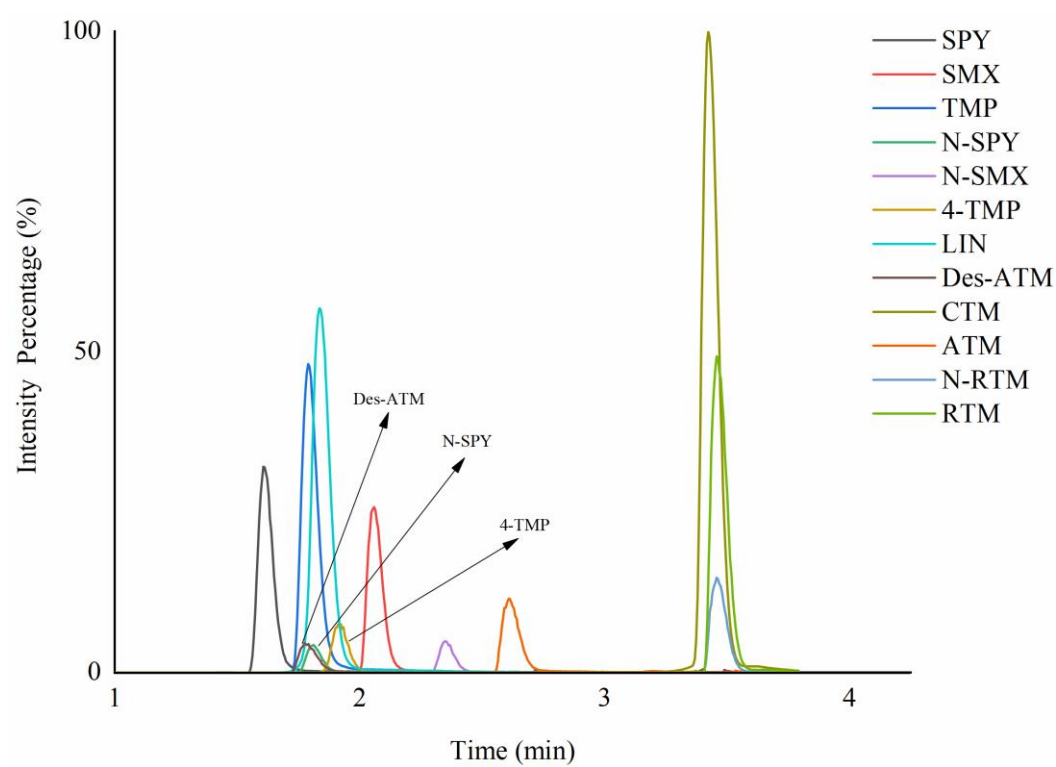

**Figure S4.** Total-ion chromatogram of the selected analytes prepared in methanol/ultrapure water (1:1) under mobile phase: 0.1% formic acid with 10 mM ammonium acetate in ultrapure water and 0.1% formic acid in methanol (Combination 3). The concentration of the analytes was 50  $\mu\text{g/L}$ .
